# Supplementary material for: Relationship between psychological characteristics, personality traits, and training on performance in a neonatal resuscitation scenario: A machine learning based analysis
Source: Frontiers journal article supplement (doi:10.3389/fped.2022.1000544), 2022-11-18
Supplement: Data_Sheet_1.PDF [file Data_Sheet_1.PDF]

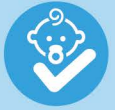

NEOCHECK

Preparation

| Question                                                                                                                                                        | Points                         |                                                                               |                                                                                                       |   |
|-----------------------------------------------------------------------------------------------------------------------------------------------------------------|--------------------------------|-------------------------------------------------------------------------------|-------------------------------------------------------------------------------------------------------|---|
|                                                                                                                                                                 | 0                              | 1                                                                             | 2                                                                                                     | 3 |
| <sup>1</sup> Did the participant put on gloves?                                                                                                                 | <input type="radio"/> not done | <input type="radio"/> done                                                    |                                                                                                       |   |
| <sup>2</sup> Did the participant turn on the overhead warmer?                                                                                                   | <input type="radio"/> not done | <input type="radio"/> done                                                    |                                                                                                       |   |
| <sup>3</sup> Did the participant place at least two warm towels at the resuscitation unit?                                                                      | <input type="radio"/> not done | <input type="radio"/> done                                                    |                                                                                                       |   |
| <sup>4</sup> Did the participant place the ventilation device (e.g. bag mask valve or T-piece) at the resuscitation unit + checked functionality of the device? | <input type="radio"/> not done | <input type="radio"/> placed the ventilation device at the resuscitation unit | <input type="radio"/> placed the ventilation device at the resuscitation unit & checked functionality |   |
| <sup>5</sup> Did the participant check whether the mask size is appropriate for the estimated weight of the newborn?                                            | <input type="radio"/> not done | <input type="radio"/> done                                                    |                                                                                                       |   |
| <sup>6</sup> Did the participant test and prepare the suction unit?                                                                                             | <input type="radio"/> not done | <input type="radio"/> prepared or tested suction unit                         | <input type="radio"/> prepared & tested suction unit                                                  |   |
| <sup>7</sup> Did the participant place the ECG leads to assess basic heart rate at the resuscitation unit?                                                      | <input type="radio"/> not done | <input type="radio"/> done                                                    |                                                                                                       |   |
| <sup>8</sup> Did the participant connect the oxygen tubing to the ventilation device (e.g. bag-mask valve or T-piece)?                                          | <input type="radio"/> not done | <input type="radio"/> done                                                    |                                                                                                       |   |
| <sup>9</sup> Did the participant place the oxygen saturation probe at the resuscitation unit?                                                                   | <input type="radio"/> not done | <input type="radio"/> done                                                    |                                                                                                       |   |
| <sup>10</sup> Did the participant place the stethoscope at the resuscitation unit?                                                                              | <input type="radio"/> not done | <input type="radio"/> done                                                    |                                                                                                       |   |
| <sup>11</sup> Did the participant prepare for any additional specific interventions such as intravenous access, fluid, medication?                              | <input type="radio"/> not done | <input type="radio"/> done                                                    |                                                                                                       |   |

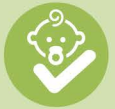

NEOCHECK

Resuscitation (1/2)

| Question                                                                                                   | Points                         |                                                                                  |                                                                                                |                                                      |
|------------------------------------------------------------------------------------------------------------|--------------------------------|----------------------------------------------------------------------------------|------------------------------------------------------------------------------------------------|------------------------------------------------------|
|                                                                                                            | 0                              | 1                                                                                | 2                                                                                              | 3                                                    |
| 12 Did the participant start an available timer at the newborn's arrival at the heat unit?                 | <input type="radio"/> not done | <input type="radio"/> done (within 1 min. of arrival)                            |                                                                                                |                                                      |
| 13 Did the participant place the newborn with its head towards him- or herself before ventilation started? | <input type="radio"/> not done | <input type="radio"/> as ventilation started                                     | <input type="radio"/> initially                                                                |                                                      |
| 14 Did the participant start with stimulation and drying the newborn?                                      | <input type="radio"/> not done | <input type="radio"/> drying (because that is also a way of stimulation)         | <input type="radio"/> drying + extra stimulation (study nurse is advised to rub the feet/body) |                                                      |
| 15 Did the participant assess the newborn's tone?                                                          | <input type="radio"/> not done | <input type="radio"/> done                                                       |                                                                                                |                                                      |
| 16 Did the participant assess whether the baby was breathing?                                              | <input type="radio"/> not done |                                                                                  | <input type="radio"/> done                                                                     |                                                      |
| 17 Did the participant place the baby's head in a neutral position?                                        | <input type="radio"/> not done | <input type="radio"/> done                                                       |                                                                                                |                                                      |
| 18 Did the participant assess or ask if the airway was obstructed?                                         | <input type="radio"/> not done | <input type="radio"/> done                                                       |                                                                                                |                                                      |
| 19 Did the participant start with 5 initial positive pressure ventilations?                                | <input type="radio"/> not done | <input type="radio"/> done                                                       |                                                                                                |                                                      |
| 20 Did the participant assess whether there was chest wall movement with the first 5 initial ventilations? | <input type="radio"/> not done | <input type="radio"/> done                                                       |                                                                                                |                                                      |
| 21 Did the participant try to optimize ventilation?                                                        | <input type="radio"/> not done | <input type="radio"/> done alternatives (2-person airway control, repositioning) | <input type="radio"/> done (guedel or change of mask size)                                     | <input type="radio"/> done alternative + guedel/mask |
| 22 Did the participant perform another 5 ventilations after having optimized the ventilation before?       | <input type="radio"/> not done | <input type="radio"/> done                                                       |                                                                                                |                                                      |
| 23 Did the participant assess chest movement again during the second course of 5 ventilations?             | <input type="radio"/> not done | <input type="radio"/> done                                                       |                                                                                                |                                                      |

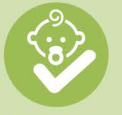

NEOCHECK

Resuscitation (2/2)

| Question                                                                                                                                          | Points                                             |                                                       |                                        |   |
|---------------------------------------------------------------------------------------------------------------------------------------------------|----------------------------------------------------|-------------------------------------------------------|----------------------------------------|---|
|                                                                                                                                                   | 0                                                  | 1                                                     | 2                                      | 3 |
| <sup>24</sup> Did the participant assess the newborns heart rate (e.g. via ECG, auscultation, etc.?)                                              | <input type="radio"/> not done                     | <input type="radio"/> done                            |                                        |   |
| <sup>25</sup> Did the participant perform another 5 ventilations after having assessed the low heart rate                                         | <input type="radio"/> not done                     | <input type="radio"/> done                            | <input type="radio"/> initially        |   |
| <sup>26</sup> Did the participant assess chest wall movement during this time of ventilation?                                                     | <input type="radio"/> not done                     | <input type="radio"/> done                            |                                        |   |
| <sup>27</sup> Did the participant assess heart rate after 2x5 times effective ventilation?                                                        | <input type="radio"/> not done                     | <input type="radio"/> done                            |                                        |   |
| <sup>28</sup> Did the participant ask for additional help?                                                                                        | <input type="radio"/> not done                     | <input type="radio"/> after CPR begin                 | <input type="radio"/> before CPR begin |   |
| <sup>29</sup> Did the participant initiate to start CPR?                                                                                          | <input type="radio"/> not done                     | <input type="radio"/> done                            |                                        |   |
| <sup>30</sup> Did the participant use the correct CPR algorithm?                                                                                  | <input type="radio"/> not done (or other than 3:1) | <input type="radio"/> done (3 compressions: 1 breath) |                                        |   |
| <sup>31</sup> Did the participant assess the heartrate after 30 seconds of CPR?                                                                   | <input type="radio"/> not done                     | <input type="radio"/> done +/- 10 seconds             | <input type="radio"/> done (in time)   |   |
| <sup>32</sup> Did the participant stop chest compressions for heart rate assessment?                                                              | <input type="radio"/> not done                     | <input type="radio"/> done                            |                                        |   |
| <sup>33</sup> Did the participant make the right decision whether to stop or to continue chest compressions? (with HR > 60/min. stop compression) | <input type="radio"/> not done                     | <input type="radio"/> done                            |                                        |   |
| <sup>34</sup> Did the participant assess the newborn's breathing after chest compression was ceased?                                              | <input type="radio"/> not done                     | <input type="radio"/> done                            |                                        |   |
| <sup>35</sup> Did the participant continue with assisted ventilation?                                                                             | <input type="radio"/> not done                     | <input type="radio"/> done                            |                                        |   |
| <sup>36</sup> Did the participant substitute the wet towels by dry ones at any time during resuscitation?                                         | <input type="radio"/> not done                     | <input type="radio"/> done                            |                                        |   |
| <sup>37</sup> Did the participant obtain intravenous or intraosseus access?                                                                       | <input type="radio"/> not done                     | <input type="radio"/> done                            |                                        |   |
| OVERALL SCORE:                                                                                                                                    |                                                    |                                                       |                                        |   |
